# Supplementary material
Source: PubMed Central journal article supplement (PMC8411726)

Reprinted from Journal of Cardiovascular and Thoracic Anesthesia, Assessment of Image Quality of Repeated Limited Transthoracic Echocardiography After Cardiac Surgery, Vol 31, Canty DJ, Heiberg J, Tan JA, Yang Y, Royse AG, Royse CF, Mobeirek A, El Shaer F, Albacker T, Nazer R, Fouda M, Bakir B, Alsaddique A, Assessment of Image Quality of Repeated Limited Transthoracic Echocardiography After Cardiac Surgery, 965-972, Copyright 2016, with permission from Elsevier.

## **Supplementary Materials**

### **DETAILS, DEFINITIONS, AND EVALUATION OF THE IMAGE QUALITY SCORING SYSTEM**

The 68-point image quality scoring system assesses the 2-dimensional appearance of standard cardiac structures from 10 standard views using the parasternal, apical, and subcostal windows. Each view comprises between 1 and 10 binary assessment questions, which assess adequate visualization of cardiac structures and axis alignment (eg, absence of foreshortening of the left ventricle [LV] or ascending aorta, positioning the region of interest in the center of the sector, and a suitable sector depth). The views included the parasternal long-axis view (10 points), right ventricular inflow view (4 points), parasternal short-axis view at the level of the aortic valve (7 points), the mid LV (8 points), apical 4-chamber view (9 points), apical 5-chamber view (1 point), apical 2-chamber view (8 points), apical long-axis view (9 points), subcostal 4-chamber view (8 points), and the subcostal inferior vena cava view (4 points). The total image quality score is the sum of points from each view expressed as a percentage of the maximum score (68 points). The score also may be expressed for each window and view and may be applied to both the iHeartScan protocol<sup>21</sup> and conventional comprehensive transthoracic echocardiography (TTE) protocols. A graphical illustration of the image quality scoring system is shown in Supplemental Fig 1.

## **Definitions**

For visualization of cardiac structures, the following definitions were used: left ventricular borders, right ventricle and atriums, and at least 75% of endocardial border visible at end-diastole; interatrial and interventricular septa, visible throughout systole and diastole; and aortic, pulmonary, mitral, and tricuspid valves, all leaflets separating and coapting.

Foreshortening of the LV was defined as rounding of the apex, contraction of the apex toward the center of the left ventricular cavity, complete collapse of the left ventricular walls during systole, or missing cone shape of the left ventricular cavity. Circular LV in the parasternal short-axis view was defined as no more than 20% difference between any perpendicular diameters.

## **Evaluation**

The image quality scoring system was evaluated before the study by performing a standard TTE protocol by 2 expert echocardiographers on 5 normal adult volunteers. To simulate differing grades of image quality, each echocardiographer performed 3 TTE studies with differing image quality (best effort, good effort, and poor effort) on each of the 5 volunteers. The images of the 15 TTE studies were stored digitally in de-identified DICOM format. The order of the studies was randomized and assessed offline by 2 observers, who did not perform the TTE studies and who were blinded to both model and image quality effort.

Interobserver agreement was assessed by measuring the mean difference and 95% limits of agreement, and the agreement between observers was considered to be acceptable if the 95% limits of agreement were less than 30% of the mean value. The mean difference between observers was  $6\% \pm 7\%$  with limits of agreement that were 29% of the mean value, which was

within the acceptable range. The ability of the image quality scoring system to discriminate among the differing grades of image quality was confirmed by separation of scores (Supplemental Fig 2).

**Supplemental Fig 1.** Image quality scoring system. Overview of the image quality scoring system showing the number of points obtainable in each view (from A to J), with each of the binary assessment questions representing 1 point. The following definitions were used: (1) left ventricular borders, right ventricle, and atriums—at least 75% of endocardial border visible at end-diastole; (2) interatrial and interventricular septa—visible throughout systole and diastole; (3) aortic, pulmonary, mitral, and tricuspid valves—all leaflets separating and coapting. Foreshortening of the left ventricle was defined as rounding of the apex, contraction of the apex toward the center of the left ventricular cavity, complete collapse of the left ventricular walls during systole, or missing cone shape of the left ventricular cavity. Circular left ventricle in the parasternal short-axis view was defined as no more than 20% difference between any perpendicular diameters. LV, left ventricle.

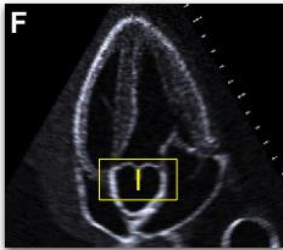

### Apical 5-chamber view (1 point)

#### Structures

- I Aortic valve

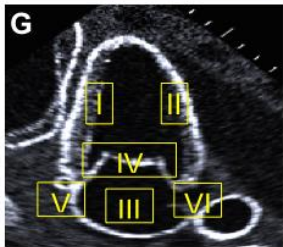

### Apical 2-chamber view (8 points)

#### Structures

- I LV inferior border  
 II LV anterior border  
 III Left atrium  
 IV Mitral valve  
 V Coronary sinus  
 VI Left atrial appendage

#### Other

- VII No foreshortening of the left ventricle  
 VIII Left atrium and LV apex in the centre of the image

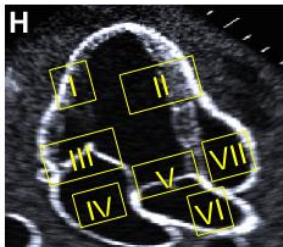

### Apical long-axis view (9 points)

#### Structures

- I LV inferolateral border  
 II LV anteroseptal border  
 III Mitral valve  
 IV Left atrium  
 V Aortic valve  
 VI Aorta fully open  
 VII Right ventricle

#### Other

- VIII LV apex in the centre of the image  
 IX No foreshortening of the LV

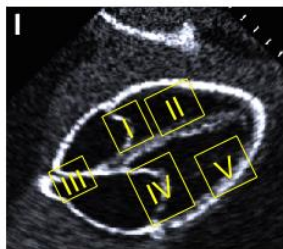

### Subcostal 4-chamber view (8 points)

#### Structures

- I Tricuspid valve  
 II Right ventricle  
 III Interatrial septum  
 IV Mitral valve  
 V LV lateral border

#### Other

- VI No foreshortening of the left ventricle  
 VII Depth setting increased compared with previous loop  
 VIII Mitral and tricuspid valves in the centre of the image

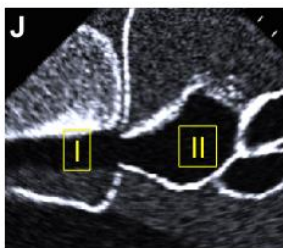

### Inferior cava vein view (4 points)

#### Structures

- I Inferior cava vein  
 II Right atrium

#### Other

- III Junction of inferior cava vein/right atrium in the centre  
 IV Inferior cava vein parallel walls, reach edge of sector

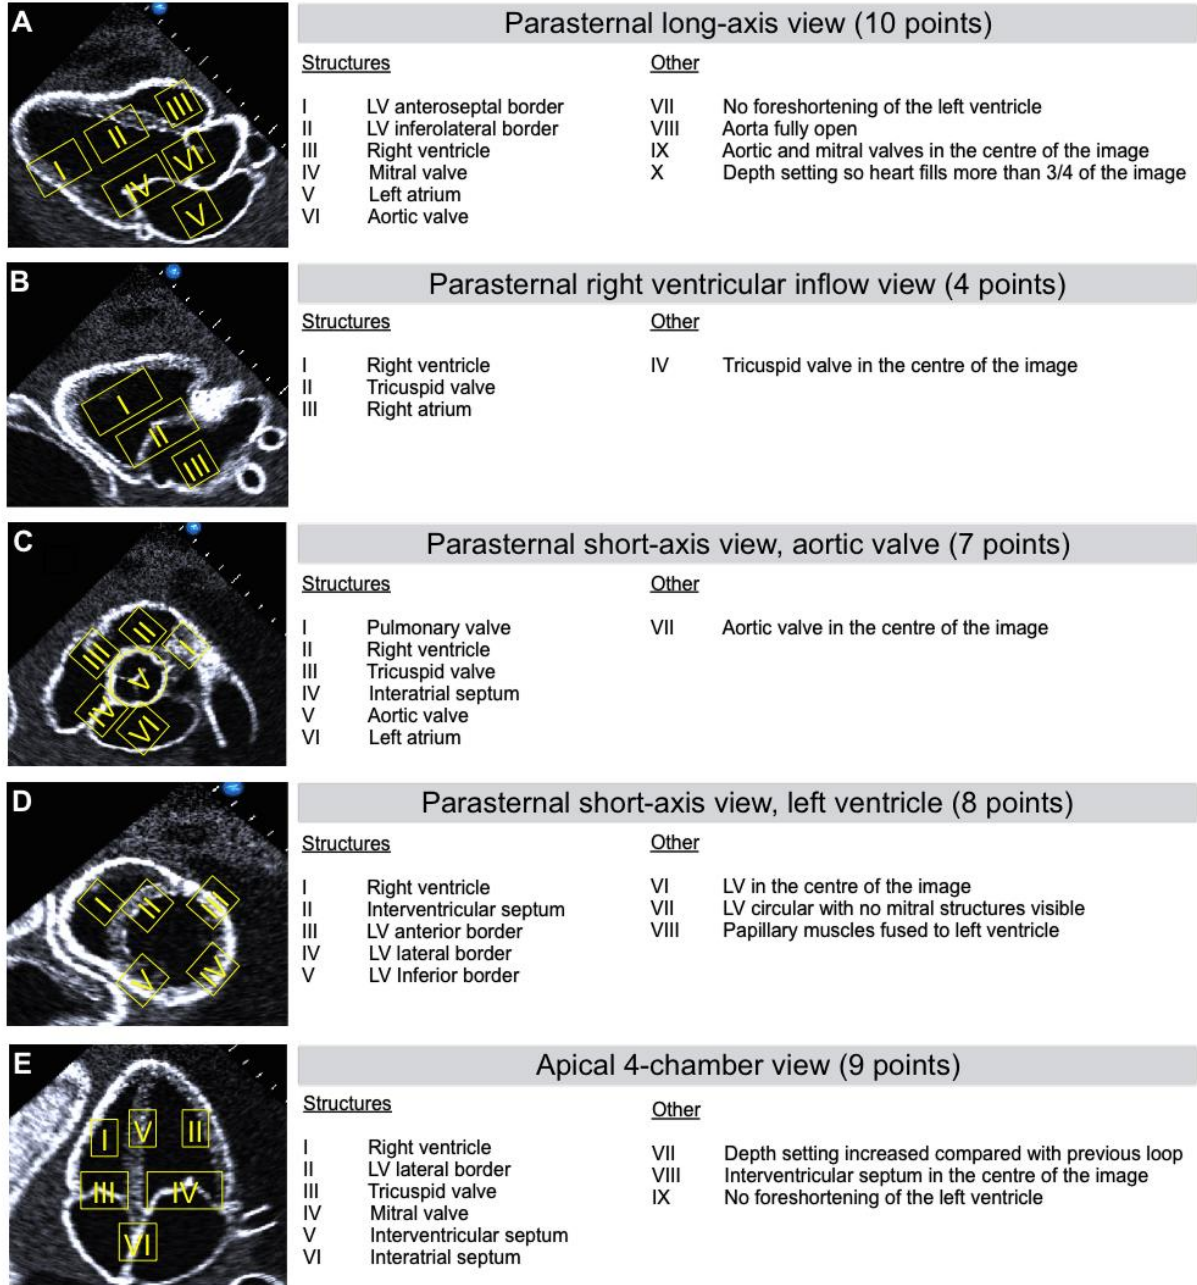

**Supplemental Fig 2.** Graphical evaluation of the image quality scoring system. Image quality scores after performance of a standard transthoracic echocardiography (TTE) protocol by 2 expert echocardiographers on 5 normal adult volunteers for whom each echocardiographer performed 3 TTE studies with differing image quality (best effort, good effort, and poor effort).

(A) A Bland-Altman plot with mean bias (*dashed line*) and 95% limits of agreement (*dotted lines*). (B) The scoring system's ability to discriminate among differing grades of image quality.

**A**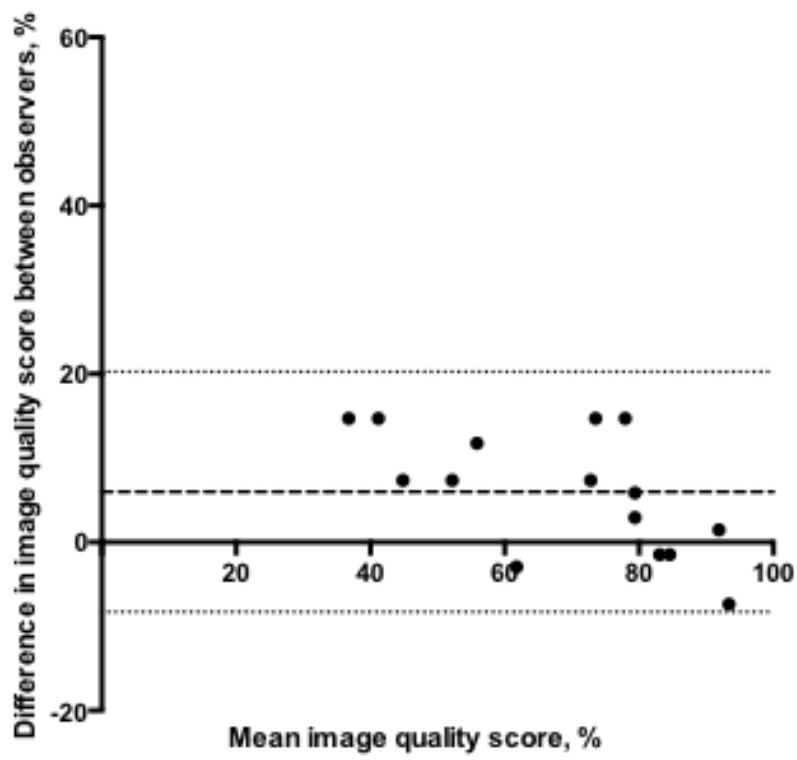**B**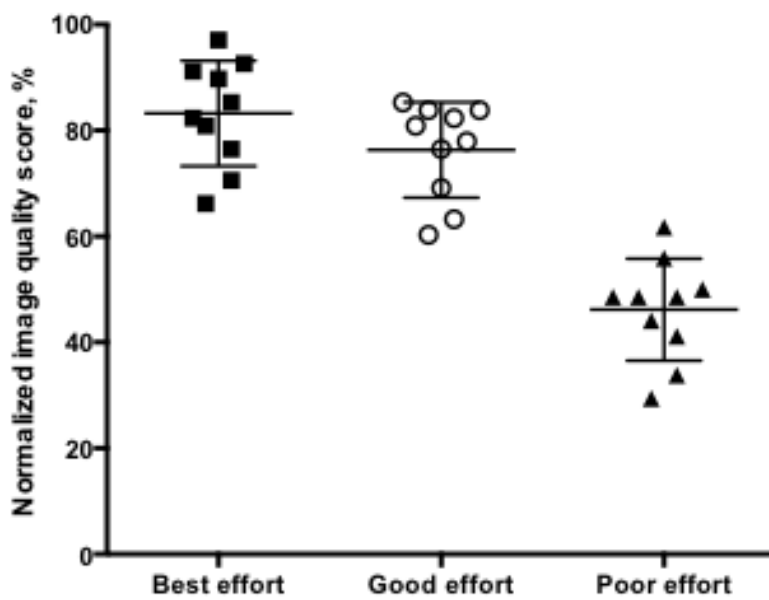

Supplement: AJUM-22-40-s001.pdf [file AJUM-22-40-s001.pdf]
